# Supplementary material for: Transcriptome analysis of Phytophthora cactorum infecting strawberry identified RXLR effectors that induce cell death when transiently expressed in Nicotiana benthamiana
Source: Front Plant Sci. 2024 May 24;15:1379970. doi: 10.3389/fpls.2024.1379970 (PMC11157022; doi:10.3389/fpls.2024.1379970)
Supplement: Supplementary file 5 [file DataSheet_4.xlsx]

## Sheet: Description
1. TM-score matrix	Template modeling score matrix of RXLR effectors identified in the transcriptome study of Phytophthora cactorum isolate 10300 at 48 hours after inoculation of zoospore in the crown of strawberry
	Pc is the abbreviated form of PC110_g in the RXLR ID and was obtained from P. cactorum accession GCA_003287315.1.
	RXLRs that induced cell death in Nicotiana benthamiana are repreented in bold.

## Sheet: TM-score matrix
RXLR IDs	Pc741	Pc1530	Pc2488	Pc3969	Pc4180	Pc5187	Pc7604	Pc7628	Pc8318	Pc8682	Pc9279	Pc10890	Pc11254	Pc12148	Pc12728	Pc15067	Pc16443	Pc16451	Pc16706	Pc16877	Pc17244	Pc17901	Pc18286	Pc18769	Pc19202	Pc19237	Pc19826	Pc19898	Pc19924	Pc20579	Pc20589	Pc20813	Pc21899	Pc22014	Pc22183	Pc22254	Pc22290	Pc22490	Pc22506
Pc741	1	0.3068	0.2324	0.4693	0.307	0.2358	0.3488	0.3272	0.208	0.2884	0.3732	0.2819	0.3254	0.2406	0.3451	0.3226	0.3036	0.2724	0.3629	0.3455	0.3187	0.2883	0.3239	0.2805	0.2503	0.3444	0.2465	0.3342	0.2455	0.2145	0.3464	0.3695	0.2982	0.3176	0.4413	0.3408	0.2651	0.2978	0.2773
Pc1530	0.3068	1	0.3305	0.3181	0.2344	0.2799	0.2933	0.2426	0.2967	0.3147	0.2164	0.2339	0.3161	0.2138	0.3357	0.2869	0.3047	0.2997	0.2676	0.261	0.2077	0.245	0.2468	0.314	0.2159	0.2319	0.2734	0.2802	0.2167	0.2099	0.244	0.2483	0.2657	0.2574	0.373	0.2721	0.2542	0.2724	0.247
Pc2488	0.2324	0.3305	1	0.2257	0.2256	0.2437	0.2929	0.4248	0.1887	0.2574	0.263	0.2283	0.188	0.2643	0.2347	0.4293	0.306	0.1985	0.2753	0.4537	0.3688	0.2799	0.358	0.2897	0.2443	0.3427	0.2221	0.1998	0.267	0.212	0.3103	0.2687	0.3127	0.2849	0.4768	0.2648	0.2954	0.271	0.2657
Pc3969	0.4693	0.3181	0.2257	1	0.3046	0.2188	0.3992	0.2597	0.3528	0.3518	0.4111	0.3735	0.3482	0.2863	0.4678	0.3021	0.265	0.3339	0.3502	0.4306	0.2741	0.3952	0.3708	0.3394	0.3414	0.3051	0.337	0.3124	0.2962	0.3237	0.3139	0.2723	0.3201	0.348	0.4383	0.276	0.4004	0.2943	0.3544
Pc4180	0.307	0.2344	0.2256	0.3046	1	0.2409	0.2876	0.2346	0.3543	0.3441	0.2688	0.3064	0.4037	0.2345	0.3571	0.2386	0.2223	0.2976	0.3367	0.2668	0.2953	0.3657	0.2932	0.4331	0.3854	0.2629	0.3593	0.313	0.3491	0.3665	0.2025	0.2944	0.2751	0.3621	0.3392	0.2115	0.2979	0.2004	0.3368
Pc5187	0.2358	0.2799	0.2437	0.2188	0.2409	1	0.2628	0.2346	0.216	0.2407	0.2344	0.209	0.2085	0.1785	0.224	0.2384	0.2959	0.2428	0.2433	0.1977	0.2462	0.1761	0.2393	0.2497	0.2173	0.2404	0.2781	0.2157	0.2419	0.2747	0.2485	0.2751	0.183	0.224	0.4686	0.2831	0.2164	0.2454	0.2315
Pc7604	0.3488	0.2933	0.2929	0.3992	0.2876	0.2628	1	0.2782	0.2915	0.3128	0.3233	0.386	0.3578	0.2874	0.426	0.2726	0.2461	0.3297	0.3474	0.3244	0.2663	0.3565	0.3968	0.3186	0.2857	0.2949	0.3351	0.3257	0.2758	0.3199	0.2649	0.3337	0.3479	0.3003	0.4268	0.2483	0.3264	0.2644	0.3997
Pc7628	0.3272	0.2426	0.4248	0.2597	0.2346	0.2346	0.2782	1	0.2487	0.2982	0.2468	0.2501	0.2862	0.2814	0.3184	0.4238	0.3188	0.2181	0.2987	0.3887	0.3349	0.3141	0.291	0.3101	0.319	0.3512	0.2758	0.2672	0.3491	0.2895	0.2585	0.3401	0.2889	0.2268	0.5783	0.323	0.328	0.3189	0.3075
Pc8318	0.208	0.2967	0.1887	0.3528	0.3543	0.216	0.2915	0.2487	1	0.3363	0.3681	0.2626	0.2936	0.2629	0.288	0.2148	0.2971	0.2357	0.3189	0.3481	0.2879	0.2897	0.2931	0.2436	0.3573	0.2795	0.3148	0.2698	0.2238	0.2632	0.2603	0.302	0.2859	0.2701	0.3684	0.2669	0.2819	0.2732	0.384
Pc8682	0.2884	0.3147	0.2574	0.3518	0.3441	0.2407	0.3128	0.2982	0.3363	1	0.3557	0.3692	0.3548	0.3099	0.3885	0.2745	0.3686	0.2603	0.3729	0.2764	0.287	0.3631	0.3168	0.3981	0.3121	0.2981	0.3437	0.362	0.2848	0.3737	0.229	0.3779	0.3223	0.3606	0.4518	0.256	0.3072	0.2854	0.3642
Pc9279	0.3732	0.2164	0.263	0.4111	0.2688	0.2344	0.3233	0.2468	0.3681	0.3557	1	0.3281	0.3009	0.2745	0.3364	0.2693	0.29	0.2763	0.3046	0.3285	0.2726	0.3246	0.3634	0.3108	0.348	0.2586	0.2853	0.306	0.3318	0.3138	0.2998	0.2901	0.347	0.2459	0.4232	0.2483	0.3739	0.2686	0.3431
Pc10890	0.2819	0.2339	0.2283	0.3735	0.3064	0.209	0.386	0.2501	0.2626	0.3692	0.3281	1	0.401	0.3036	0.4113	0.3074	0.214	0.2908	0.4107	0.3335	0.2404	0.3645	0.3176	0.4158	0.2937	0.263	0.3815	0.3908	0.3606	0.3345	0.2169	0.3311	0.393	0.3153	0.332	0.272	0.3698	0.2347	0.3055
Pc11254	0.3254	0.3161	0.188	0.3482	0.4037	0.2085	0.3578	0.2862	0.2936	0.3548	0.3009	0.401	1	0.3064	0.4115	0.3082	0.3118	0.3011	0.4385	0.3842	0.2888	0.4603	0.3054	0.4686	0.2966	0.3544	0.3211	0.4479	0.2583	0.391	0.2673	0.3945	0.3741	0.3605	0.4622	0.2955	0.2774	0.2504	0.4211
Pc12148	0.2406	0.2138	0.2643	0.2863	0.2345	0.1785	0.2874	0.2814	0.2629	0.3099	0.2745	0.3036	0.3064	1	0.3543	0.3071	0.2525	0.2678	0.2816	0.297	0.2232	0.3632	0.237	0.354	0.2706	0.3283	0.269	0.3022	0.3082	0.3949	0.2146	0.2713	0.2525	0.2809	0.3394	0.2152	0.2778	0.2535	0.3227
Pc12728	0.3451	0.3357	0.2347	0.4678	0.3571	0.224	0.426	0.3184	0.288	0.3885	0.3364	0.4113	0.4115	0.3543	1	0.3403	0.2681	0.3126	0.3842	0.3997	0.3289	0.3323	0.4152	0.4286	0.306	0.3581	0.2733	0.3681	0.2539	0.2778	0.2824	0.3339	0.3014	0.3704	0.3574	0.2364	0.3446	0.2422	0.3107
Pc15067	0.3226	0.2869	0.4293	0.3021	0.2386	0.2384	0.2726	0.4238	0.2148	0.2745	0.2693	0.3074	0.3082	0.3071	0.3403	1	0.2696	0.285	0.3207	0.4365	0.2959	0.331	0.2802	0.3234	0.3339	0.3501	0.2698	0.2592	0.3985	0.2765	0.2453	0.3225	0.2585	0.2616	0.4631	0.2993	0.3259	0.31	0.3478
Pc16443	0.3036	0.3047	0.306	0.265	0.2223	0.2959	0.2461	0.3188	0.2971	0.3686	0.29	0.214	0.3118	0.2525	0.2681	0.2696	1	0.2422	0.2674	0.2566	0.2934	0.2569	0.2634	0.2828	0.3109	0.2682	0.2626	0.306	0.261	0.2858	0.2434	0.3017	0.1914	0.2174	0.5039	0.3518	0.2826	0.3312	0.2716
Pc16451	0.2724	0.2997	0.1985	0.3339	0.2976	0.2428	0.3297	0.2181	0.2357	0.2603	0.2763	0.2908	0.3011	0.2678	0.3126	0.285	0.2422	1	0.2609	0.3322	0.2208	0.288	0.2745	0.2755	0.2333	0.2997	0.2712	0.2556	0.2509	0.2952	0.283	0.2899	0.2855	0.2835	0.3886	0.214	0.2249	0.263	0.2804
Pc16706	0.3629	0.2676	0.2753	0.3502	0.3367	0.2433	0.3474	0.2987	0.3189	0.3729	0.3046	0.4107	0.4385	0.2816	0.3842	0.3207	0.2674	0.2609	1	0.422	0.2971	0.387	0.2889	0.3783	0.2567	0.4496	0.3246	0.3284	0.3102	0.3601	0.2685	0.3176	0.3345	0.3604	0.36	0.2688	0.2581	0.2224	0.3455
Pc16877	0.3455	0.261	0.4537	0.4306	0.2668	0.1977	0.3244	0.3887	0.3481	0.2764	0.3285	0.3335	0.3842	0.297	0.3997	0.4365	0.2566	0.3322	0.422	1	0.2898	0.447	0.3424	0.4329	0.3806	0.3633	0.3836	0.2996	0.4921	0.3367	0.2582	0.3045	0.2814	0.295	0.3695	0.2566	0.3936	0.2457	0.4395
Pc17244	0.3187	0.2077	0.3688	0.2741	0.2953	0.2462	0.2663	0.3349	0.2879	0.287	0.2726	0.2404	0.2888	0.2232	0.3289	0.2959	0.2934	0.2208	0.2971	0.2898	1	0.321	0.3091	0.297	0.2535	0.294	0.2848	0.2982	0.3334	0.2948	0.3103	0.3322	0.2296	0.2561	0.5002	0.2984	0.3972	0.2545	0.3203
Pc17901	0.2883	0.245	0.2799	0.3952	0.3657	0.1761	0.3565	0.3141	0.2897	0.3631	0.3246	0.3645	0.4603	0.3632	0.3323	0.331	0.2569	0.288	0.387	0.447	0.321	1	0.2972	0.5504	0.3224	0.3868	0.3218	0.4519	0.3059	0.5543	0.2913	0.3742	0.4162	0.291	0.3745	0.277	0.3127	0.2977	0.4826
Pc18286	0.3239	0.2468	0.358	0.3708	0.2932	0.2393	0.3968	0.291	0.2931	0.3168	0.3634	0.3176	0.3054	0.237	0.4152	0.2802	0.2634	0.2745	0.2889	0.3424	0.3091	0.2972	1	0.3672	0.2097	0.3079	0.3361	0.3181	0.2718	0.3289	0.2566	0.332	0.3199	0.3221	0.3483	0.3	0.3446	0.2881	0.4147
Pc18769	0.2805	0.314	0.2897	0.3394	0.4331	0.2497	0.3186	0.3101	0.2436	0.3981	0.3108	0.4158	0.4686	0.354	0.4286	0.3234	0.2828	0.2755	0.3783	0.4329	0.297	0.5504	0.3672	1	0.3324	0.3871	0.3618	0.4813	0.3252	0.4168	0.2965	0.4179	0.4381	0.3677	0.3685	0.3095	0.3068	0.249	0.4885
Pc19202	0.2503	0.2159	0.2443	0.3414	0.3854	0.2173	0.2857	0.319	0.3573	0.3121	0.348	0.2937	0.2966	0.2706	0.306	0.3339	0.3109	0.2333	0.2567	0.3806	0.2535	0.3224	0.2097	0.3324	1	0.3273	0.2863	0.2724	0.2755	0.3091	0.3085	0.278	0.3222	0.2484	0.3887	0.3276	0.3117	0.3066	0.3143
Pc19237	0.3444	0.2319	0.3427	0.3051	0.2629	0.2404	0.2949	0.3512	0.2795	0.2981	0.2586	0.263	0.3544	0.3283	0.3581	0.3501	0.2682	0.2997	0.4496	0.3633	0.294	0.3868	0.3079	0.3871	0.3273	1	0.3139	0.2736	0.4118	0.356	0.2344	0.3344	0.278	0.3808	0.4168	0.2979	0.3323	0.3781	0.3578
Pc19826	0.2465	0.2734	0.2221	0.337	0.3593	0.2781	0.3351	0.2758	0.3148	0.3437	0.2853	0.3815	0.3211	0.269	0.2733	0.2698	0.2626	0.2712	0.3246	0.3836	0.2848	0.3218	0.3361	0.3618	0.2863	0.3139	1	0.3333	0.2828	0.2914	0.271	0.3101	0.3068	0.3289	0.3567	0.2497	0.2564	0.2123	0.3013
Pc19898	0.3342	0.2802	0.1998	0.3124	0.313	0.2157	0.3257	0.2672	0.2698	0.362	0.306	0.3908	0.4479	0.3022	0.3681	0.2592	0.306	0.2556	0.3284	0.2996	0.2982	0.4519	0.3181	0.4813	0.2724	0.2736	0.3333	1	0.2658	0.4417	0.2542	0.3431	0.3487	0.3159	0.4076	0.3555	0.3015	0.2215	0.4539
Pc19924	0.2455	0.2167	0.267	0.2962	0.3491	0.2419	0.2758	0.3491	0.2238	0.2848	0.3318	0.3606	0.2583	0.3082	0.2539	0.3985	0.261	0.2509	0.3102	0.4921	0.3334	0.3059	0.2718	0.3252	0.2755	0.4118	0.2828	0.2658	1	0.298	0.2653	0.2273	0.3268	0.2843	0.4243	0.2719	0.3503	0.2783	0.3076
Pc20579	0.2145	0.2099	0.212	0.3237	0.3665	0.2747	0.3199	0.2895	0.2632	0.3737	0.3138	0.3345	0.391	0.3949	0.2778	0.2765	0.2858	0.2952	0.3601	0.3367	0.2948	0.5543	0.3289	0.4168	0.3091	0.356	0.2914	0.4417	0.298	1	0.3184	0.3882	0.3741	0.3223	0.3943	0.2593	0.2537	0.243	0.4573
Pc20589	0.3464	0.244	0.3103	0.3139	0.2025	0.2485	0.2649	0.2585	0.2603	0.229	0.2998	0.2169	0.2673	0.2146	0.2824	0.2453	0.2434	0.283	0.2685	0.2582	0.3103	0.2913	0.2566	0.2965	0.3085	0.2344	0.271	0.2542	0.2653	0.3184	1	0.3037	0.2118	0.2474	0.4639	0.2834	0.2609	0.2492	0.2934
Pc20813	0.3695	0.2483	0.2687	0.2723	0.2944	0.2751	0.3337	0.3401	0.302	0.3779	0.2901	0.3311	0.3945	0.2713	0.3339	0.3225	0.3017	0.2899	0.3176	0.3045	0.3322	0.3742	0.332	0.4179	0.278	0.3344	0.3101	0.3431	0.2273	0.3882	0.3037	1	0.3442	0.3449	0.4886	0.2924	0.2716	0.3435	0.3697
Pc21899	0.2982	0.2657	0.3127	0.3201	0.2751	0.183	0.3479	0.2889	0.2859	0.3223	0.347	0.393	0.3741	0.2525	0.3014	0.2585	0.1914	0.2855	0.3345	0.2814	0.2296	0.4162	0.3199	0.4381	0.3222	0.278	0.3068	0.3487	0.3268	0.3741	0.2118	0.3442	1	0.2361	0.3624	0.2829	0.3065	0.2429	0.3755
Pc22014	0.3176	0.2574	0.2849	0.348	0.3621	0.224	0.3003	0.2268	0.2701	0.3606	0.2459	0.3153	0.3605	0.2809	0.3704	0.2616	0.2174	0.2835	0.3604	0.295	0.2561	0.291	0.3221	0.3677	0.2484	0.3808	0.3289	0.3159	0.2843	0.3223	0.2474	0.3449	0.2361	1	0.3882	0.26	0.2594	0.2771	0.3128
Pc22183	0.4413	0.373	0.4768	0.4383	0.3392	0.4686	0.4268	0.5783	0.3684	0.4518	0.4232	0.332	0.4622	0.3394	0.3574	0.4631	0.5039	0.3886	0.36	0.3695	0.5002	0.3745	0.3483	0.3685	0.3887	0.4168	0.3567	0.4076	0.4243	0.3943	0.4639	0.4886	0.3624	0.3882	1	0.4448	0.4618	0.4738	0.4152
Pc22254	0.3408	0.2721	0.2648	0.276	0.2115	0.2831	0.2483	0.323	0.2669	0.256	0.2483	0.272	0.2955	0.2152	0.2364	0.2993	0.3518	0.214	0.2688	0.2566	0.2984	0.277	0.3	0.3095	0.3276	0.2979	0.2497	0.3555	0.2719	0.2593	0.2834	0.2924	0.2829	0.26	0.4448	1	0.2923	0.2855	0.2879
Pc22290	0.2651	0.2542	0.2954	0.4004	0.2979	0.2164	0.3264	0.328	0.2819	0.3072	0.3739	0.3698	0.2774	0.2778	0.3446	0.3259	0.2826	0.2249	0.2581	0.3936	0.3972	0.3127	0.3446	0.3068	0.3117	0.3323	0.2564	0.3015	0.3503	0.2537	0.2609	0.2716	0.3065	0.2594	0.4618	0.2923	1	0.3483	0.3038
Pc22490	0.2978	0.2724	0.271	0.2943	0.2004	0.2454	0.2644	0.3189	0.2732	0.2854	0.2686	0.2347	0.2504	0.2535	0.2422	0.31	0.3312	0.263	0.2224	0.2457	0.2545	0.2977	0.2881	0.249	0.3066	0.3781	0.2123	0.2215	0.2783	0.243	0.2492	0.3435	0.2429	0.2771	0.4738	0.2855	0.3483	1	0.2597
Pc22506	0.2773	0.247	0.2657	0.3544	0.3368	0.2315	0.3997	0.3075	0.384	0.3642	0.3431	0.3055	0.4211	0.3227	0.3107	0.3478	0.2716	0.2804	0.3455	0.4395	0.3203	0.4826	0.4147	0.4885	0.3143	0.3578	0.3013	0.4539	0.3076	0.4573	0.2934	0.3697	0.3755	0.3128	0.4152	0.2879	0.3038	0.2597	1
TM>0,5
TM=0,5
TM between cell death inducing RXLRs
